# Supplementary material for: Safety and efficacy of ALRV5XR in men with androgenetic alopecia: A randomised, double-blinded, placebo-controlled clinical trial
Source: PubMed Central journal article supplement — eClinicalMedicine. 2021 Sep 11;40:101124. doi: 10.1016/j.eclinm.2021.101124 (PMC8435693; doi:10.1016/j.eclinm.2021.101124), 2021-09-11
Supplement: mmc1.pdf [file mmc1.pdf]

## SUPPLEMENTARY MATERIALS

EClinicalMedicine 40 (2021) 101124  
<https://doi.org/10.1016/j.eclinm.2021.101124>

### **Safety and Efficacy of ALRV5XR in Men with Androgenetic Alopecia: A Randomised, Double-Blinded, Placebo-Controlled Clinical Trial**

**Authors:** Peter R Feldman<sup>a\*</sup>, Klaus M Fiebig<sup>a\*</sup>, Charles Piwko<sup>b</sup>, Boris M Mints<sup>c</sup>, Dennis Brown<sup>d</sup>, Deborah J Cahan<sup>a</sup>  
and Jaime Guevara-Aguirre<sup>e,f,g,h</sup>

#### **Author Affiliations:**

<sup>a</sup> Arbor Life Labs, Toronto, Ontario, Canada

<sup>b</sup> CHP Pharma Inc, Thornhill, Ontario, Canada

<sup>c</sup> B&B International, Vilnius, Lithuania

<sup>d</sup> Valent Technologies, Menlo Park, California, USA

<sup>e</sup> Universidad San Francisco de Quito (USFQ), Quito, Ecuador

<sup>f</sup> Institute of Endocrinology, Metabolism, and Reproduction (IEMYR), Quito, Ecuador

<sup>g</sup> Maastricht University, Maastricht, The Netherlands

<sup>h</sup> College of Medicine, University of Florida, Gainesville, Florida, USA

\* Corresponding authors.

E-mail address: [petefeldman@gmail.com](mailto:petefeldman@gmail.com) (P. Feldman), [klausfiebig@gmail.com](mailto:klausfiebig@gmail.com) (K. Fiebig)

#### **Supplementary Tables**

Table S1: Abbreviations

Table S2: ALRV5XR Material Active Ingredients

Table S3: Laboratory and Physical Exam Results.

Table S3a: Blood Laboratory Results.

Table S3b: Urine Laboratory Results.

Table S3c: Physical Exam Results.

Table S4: Adverse Events.

Table S5: ALRV5XR Responder Distribution.

#### **Supplementary Figures**

Figure S1: ALRV5XR treatment group changes in Terminal Hair.

(a) Changes per cm<sup>2</sup>.

(b) Changes by per cent.

#### **Supplementary Content**

Appendix S1: Supplementary Statistical Methods

## Supplementary Tables and Figures

**Table S1. Abbreviations**

| <b>Text Abbreviations</b>                            |                                                  |
|------------------------------------------------------|--------------------------------------------------|
| AGA                                                  | Androgenetic Alopecia                            |
| BVM                                                  | Botanical, Vitamin and Mineral                   |
| FDA                                                  | Food and Drug Administration                     |
| FPHL                                                 | Female Pattern Hair Loss                         |
| HF                                                   | Hair Follicle                                    |
| HFSC                                                 | Hair Follicle Stem Cell                          |
| HL                                                   | Hair Loss                                        |
| MOA                                                  | Mechanism of Action                              |
| MPHL                                                 | Male Pattern Hair Loss                           |
| QoL                                                  | Quality of Life                                  |
| SC                                                   | Stem Cell                                        |
| TAHC                                                 | Target Area Hair Count                           |
| TE                                                   | Telogen Effluvium                                |
| TH                                                   | Terminal Hair                                    |
| THC                                                  | Terminal Hair Count                              |
| VH                                                   | Vellus Hair                                      |
| <b>Units of Measure</b>                              |                                                  |
| CI                                                   | Confidence Interval                              |
| cm                                                   | Centimetre                                       |
| µm                                                   | Micrometre                                       |
| mm                                                   | Millimetre                                       |
| OR                                                   | Odds Ratio                                       |
| %                                                    | Per cent                                         |
| p                                                    | Statistical Probability – T-Test                 |
| F                                                    | Fisher Statistic - ANOVA Test                    |
| <b>Growth Factors</b>                                |                                                  |
| EGF                                                  | Epidermal Growth Factor                          |
| FGF-7                                                | Fibroblast Growth Factor – 7                     |
| FGF-18                                               | Fibroblast Growth Factor – 18                    |
| HGF                                                  | Hepatocyte Growth Factor                         |
| IGF                                                  | Insulin Growth Factor                            |
| KGF                                                  | Keratinocyte Growth Factor                       |
| VEGF                                                 | Vascular Endothelial Growth Factor               |
| <b>Dermal Papilla cell and Stem Cell stimulation</b> |                                                  |
| BMP                                                  | Bone Morphogenic Proteins                        |
| mTORC1                                               | Mammalian Target of Rapamycin – 1                |
| PKC                                                  | Protein Kinase C                                 |
| PPAR $\gamma$                                        | Peroxisome Proliferator-Activated Receptor Gamma |
| Shh                                                  | Sonic Hedgehog                                   |
| Wnt                                                  | Wingless-related integration site                |
| <b>Immunomodulation</b>                              |                                                  |
| COX                                                  | Cyclooxygenase                                   |
| IFN- $\alpha$                                        | Interferon-alpha                                 |
| IFN- $\gamma$                                        | Interferon-gamma                                 |
| IL-1b, IL-6 and IL-12                                | Interleukins -1b, 6, -12                         |
| NF- $\kappa\beta$                                    | Nuclear Factor Kappa Beta                        |
| PGE2                                                 | Prostaglandin E2                                 |
| PGD2                                                 | Prostaglandin D2                                 |
| TNF- $\alpha$ ,                                      | Tumour Necrosis Factor alpha                     |
| TGF- $\beta$                                         | Transformation Growth Factor beta                |
| <b>Androgens &amp; Mediators</b>                     |                                                  |
| 5 $\alpha$ -R                                        | 5 $\alpha$ -Reductase                            |
| DHT                                                  | Dihydrotestosterone                              |

**Table S2. ALRV5XR Material Active Ingredients**

| <b>Active Ingredients*</b> |                                                                                                                                                                                                                                                                                                                                                                                                                                                   |
|----------------------------|---------------------------------------------------------------------------------------------------------------------------------------------------------------------------------------------------------------------------------------------------------------------------------------------------------------------------------------------------------------------------------------------------------------------------------------------------|
| Oral (capsule)             | Angelica sinensis, Ascophyllum nodosum, Astragalus membranaceus, Biotin, Coenzyme Q10, Copper, Eclipta prostrata, Folate, Ganoderma lucidum, Malus domestica, Moringa oleifera, Niacin, Pantothenic acid, Polygonum multiflorum, Punica granatum, Riboflavin, Rosmarinus officinalis, Scutellaria baicalensis, Selenium, Silicon, Sophora flavescens, Vitamin A, Vitamin B6, Vitamin B7(Biotin), Vitamin B12, Vitamin D, Vitis vinifera, and Zinc |
| Shampoo                    | Caffeine, Eclipta prostrata, Lupinus, Momordica charantia, Moringa oleifera, Pyrus malus, Rosmarinus officinalis, Vitis vinifera, Scutellaria baicalensis, Vitamin B7(Biotin)                                                                                                                                                                                                                                                                     |
| Conditioner                | Caffeine, Eclipta prostrata, Lupinus, Momordica charantia, Moringa oleifera, Pyrus malus, Rosmarinus officinalis, Vitis vinifera, Scutellaria baicalensis, Vitamin B7(Biotin)                                                                                                                                                                                                                                                                     |
| Follicle serum             | Caffeine, Eclipta prostrata, Lupinus, Momordica charantia, Moringa oleifera, Ocimum basilicum, Pisum sativum, Pyrus malus, Rosmarinus officinalis, Vitis vinifera, Scutellaria baicalensis, Vitamin B7(Biotin)                                                                                                                                                                                                                                    |

\*Patents pending

**Table S3: Laboratory and Physical Exam Results.** At trial completion, there were statistically significant differences between the groups (highlighted in grey) for serum Albumin, HDL Cholesterol and Platelets. These differences were within the normal range, except for Albumin, which was slightly above the normal range for both groups, however, the ALRV5XR group was trending towards the normal range. These differences were determined not clinically relevant.

**Table S3a: Blood Laboratory Results.**

|                             |             |                 | Placebo  |        |        |          |        |        |          |        |        | ALRV5XR  |        |        |          |        |        |          |        |         | Placebo vs ALRV5XR                       |               |               |               |       |  |
|-----------------------------|-------------|-----------------|----------|--------|--------|----------|--------|--------|----------|--------|--------|----------|--------|--------|----------|--------|--------|----------|--------|---------|------------------------------------------|---------------|---------------|---------------|-------|--|
|                             |             |                 | Baseline |        |        | 12 Weeks |        |        | 24 Weeks |        |        | Baseline |        |        | 12 Weeks |        |        | 24 Weeks |        |         | T-Tests P-Value<br>(Placebo vs. ALRV5XR) |               |               |               |       |  |
| Analyte                     | UOM         | Reference Range | N        | Mean   | Stddev  | BL                                       | BL - 12 Weeks | BL - 24 Weeks | 12 - 24 Weeks |       |  |
| <b>Blood:</b>               |             |                 |          |        |        |          |        |        |          |        |        |          |        |        |          |        |        |          |        |         |                                          |               |               |               |       |  |
| Albumin                     | g/dL        | 3.4-4.2         | 18       | 4.47   | 0.213  | 16       | 4.54   | 0.247  | 17       | 4.55   | 0.245  | 21       | 4.42   | 0.291  | 16       | 4.40   | 0.262  | 16       | 4.33   | 0.316   | 0.535                                    | 0.186         | 0.015         | 0.045         |       |  |
| Alkaline Phosphatase        | IU/L        | 46-119          | 18       | 69.44  | 13.929 | 16       | 68.31  | 13.190 | 17       | 68.24  | 12.996 | 21       | 71.05  | 19.800 | 16       | 69.81  | 19.793 | 16       | 74.38  | 17.663  | 0.781                                    | 0.384         | 0.771         | 0.176         |       |  |
| ALT (SGPT)                  | IU/L        | 0-29            | 18       | 25.06  | 18.969 | 16       | 25.31  | 13.967 | 17       | 23.24  | 12.120 | 21       | 36.81  | 40.014 | 16       | 34.69  | 31.492 | 16       | 31.75  | 18.663  | 0.274                                    | 0.406         | 0.796         | 0.737         |       |  |
| AST (SGOT)                  | IU/L        | 0-120           | 18       | 24.89  | 9.533  | 16       | 24.56  | 8.888  | 17       | 22.94  | 7.787  | 21       | 24.57  | 6.884  | 16       | 29.69  | 19.924 | 16       | 23.75  | 7.980   | 0.907                                    | 0.291         | 0.945         | 0.516         |       |  |
| Baso (Absolute)             | x10E3/uL    | 0.0-0.6         | 18       | 0.02   | 0.037  | 16       | 0.03   | 0.043  | 17       | 0.02   | 0.038  | 21       | 0.01   | 0.035  | 16       | 0.02   | 0.039  | 16       | 0.03   | 0.046   | 0.842                                    | 0.564         | 0.441         | 0.186         |       |  |
| Basos                       | %           | Not Estab.      | 18       | 0.67   | 0.577  | 16       | 0.50   | 0.500  | 17       | 0.47   | 0.499  | 21       | 0.57   | 0.495  | 16       | 0.69   | 0.583  | 16       | 0.63   | 0.484   | 0.592                                    | 0.103         | 0.173         | 0.410         |       |  |
| Bilirubin, Total            | mg/dL       | 0.0-1.2         | 18       | 0.54   | 0.254  | 16       | 0.50   | 0.250  | 17       | 0.59   | 0.253  | 21       | 0.57   | 0.334  | 16       | 0.49   | 0.287  | 16       | 0.49   | 0.245   | 0.786                                    | 0.584         | 0.146         | 0.262         |       |  |
| BUN                         | mg/dL       | 6-24            | 18       | 14.83  | 2.774  | 16       | 15.63  | 2.997  | 17       | 15.71  | 3.706  | 21       | 15.33  | 4.663  | 16       | 16.50  | 2.449  | 16       | 15.00  | 3.354   | 0.700                                    | 0.952         | 0.502         | 0.174         |       |  |
| Calcium                     | mg/dL       | 8.6-10.4        | 18       | 9.40   | 0.269  | 16       | 9.45   | 0.341  | 17       | 9.33   | 0.349  | 21       | 9.48   | 0.384  | 16       | 9.48   | 0.283  | 16       | 9.39   | 0.325   | 0.496                                    | 0.294         | 0.654         | 0.723         |       |  |
| Carbon Dioxide, Total       | mmol/L      | 16-29           | 18       | 24.89  | 1.882  | 16       | 24.56  | 2.474  | 17       | 24.06  | 2.100  | 21       | 25.62  | 1.588  | 16       | 24.69  | 2.256  | 16       | 22.88  | 1.166   | 0.209                                    | 0.969         | 0.109         | 0.432         |       |  |
| Chloride                    | mmol/L      | 96-106          | 18       | 100.39 | 1.976  | 16       | 101.19 | 2.242  | 17       | 101.35 | 1.780  | 21       | 100.81 | 2.788  | 16       | 102.19 | 1.590  | 16       | 102.44 | 1.456   | 0.605                                    | 0.084         | 0.104         | 0.756         |       |  |
| Cholesterol, Total          | mg/dL       | 100-169         | 18       | 174.78 | 38.888 | 16       | 188.69 | 28.504 | 17       | 174.47 | 30.817 | 21       | 203.19 | 34.436 | 16       | 207.38 | 40.009 | 16       | 185.56 | 36.975  | 0.024                                    | 0.151         | 0.274         | 0.936         |       |  |
| C-Reactive Protein, Cardiac | mg/L        | 0.00-3.00       | 17       | 1.78   | 3.038  | 16       | 1.59   | 2.468  | 17       | 1.70   | 2.044  | 21       | 1.99   | 2.031  | 16       | 2.46   | 3.632  | 16       | 2.24   | 2.666   | 0.807                                    | 0.769         | 0.408         | 0.649         |       |  |
| Creatinine                  | mg/dL       | 0.4-1.19        | 18       | 0.93   | 0.114  | 16       | 0.99   | 0.107  | 17       | 0.96   | 0.148  | 21       | 0.94   | 0.170  | 16       | 0.98   | 0.167  | 16       | 0.91   | 0.143   | 0.791                                    | 0.688         | 0.888         | 0.902         |       |  |
| eGFR If Africn Am           | mL/min/1.73 | >59             | 18       | 111.83 | 13.777 | 16       | 104.75 | 12.467 | 16       | 109.63 | 17.084 | 21       | 108.48 | 17.565 | 16       | 105.75 | 19.337 | 16       | 111.25 | 17.181  | 0.527                                    | 0.480         | 0.778         | 0.805         |       |  |
| eGFR If Nofricn Am          | mL/min/1.73 | >59             | 18       | 96.78  | 11.914 | 16       | 90.50  | 10.671 | 16       | 94.69  | 14.696 | 21       | 94.00  | 15.191 | 16       | 91.44  | 16.677 | 16       | 96.38  | 14.887  | 0.545                                    | 0.480         | 0.730         | 0.832         |       |  |
| Eos                         | %           | Not Estab.      | 18       | 2.72   | 1.520  | 16       | 2.63   | 2.088  | 17       | 2.12   | 1.409  | 21       | 2.90   | 1.269  | 16       | 3.25   | 1.199  | 16       | 2.88   | 1.364   | 0.693                                    | 0.646         | 0.217         | 0.602         |       |  |
| Eos (Absolute)              | x10E3/uL    | 0.0-0.6         | 18       | 0.16   | 0.117  | 16       | 0.19   | 0.175  | 17       | 0.12   | 0.094  | 21       | 0.19   | 0.106  | 16       | 0.23   | 0.083  | 16       | 0.21   | 0.103   | 0.347                                    | 0.600         | 0.380         | 0.284         |       |  |
| Glucose                     | mg/dL       | 65-99           | 18       | 94.50  | 8.946  | 16       | 93.56  | 28.346 | 17       | 94.29  | 16.619 | 21       | 93.95  | 8.952  | 16       | 96.06  | 16.690 | 16       | 103.00 | 14.405  | 0.854                                    | 0.346         | 0.120         | 0.642         |       |  |
| HDL Cholesterol             | mg/dL       | >39             | 18       | 49.00  | 7.930  | 16       | 48.69  | 9.231  | 17       | 49.29  | 6.875  | 21       | 51.00  | 8.690  | 16       | 48.75  | 12.070 | 16       | 45.25  | 6.505   | 0.472                                    | 0.517         | 0.044         | 0.166         |       |  |
| Hematocrit                  | %           | 31.9-57.2       | 18       | 43.34  | 2.959  | 16       | 43.70  | 3.671  | 17       | 42.41  | 3.435  | 21       | 44.22  | 2.867  | 16       | 44.35  | 2.295  | 16       | 43.99  | 2.369   | 0.362                                    | 0.420         | 0.426         | 0.301         |       |  |
| Hemoglobin                  | g/dL        | 10.7-20.5       | 18       | 14.51  | 1.068  | 16       | 14.54  | 1.243  | 17       | 14.21  | 1.301  | 21       | 14.75  | 1.213  | 16       | 14.71  | 1.036  | 16       | 14.59  | 1.067   | 0.536                                    | 0.638         | 0.378         | 0.355         |       |  |
| Immature Grans (Abs)        | x10E3/uL    | Not Estab.      | 18       | 0.00   | 0.000  | 15       | 0.00   | 0.000  | 17       | 0.00   | 0.000  | 21       | 0.00   | 0.021  | 16       | 0.01   | 0.024  | 16       | 0.01   | 0.024   | 0.361                                    | 1.000         | 1.000         | 1.000         |       |  |
| Immature Granulocytes       | %           | Not Estab.      | 18       | 0.06   | 0.229  | 15       | 0.00   | 0.000  | 17       | 0.06   | 0.235  | 21       | 0.19   | 0.499  | 16       | 0.19   | 0.390  | 16       | 0.13   | 0.331   | 0.311                                    | 0.948         | 0.677         | 0.170         |       |  |
| INR                         | N           | 0.8-1.2         | 18       | 1.03   | 0.047  | 16       | 1.03   | 0.043  | 17       | 1.05   | 0.061  | 21       | 1.02   | 0.039  | 15       | 1.01   | 0.034  | 16       | 1.04   | 0.048   | 0.321                                    | 0.326         | 0.477         | 0.106         |       |  |
| Insulin                     | uIU/mL      | 2.6-24.9        | 19       | 10.07  | 6.510  | 16       | 21.41  | 24.915 | 16       | 16.90  | 16.183 | 19       | 12.78  | 9.982  | 16       | 30.81  | 31.045 | 16       | 32.73  | 35.052  | 0.342                                    | 0.648         | 0.336         | 0.624         |       |  |
| LDL Cholesterol Calc        | mg/dL       | 0-109           | 18       | 104.11 | 35.559 | 16       | 109.25 | 28.904 | 16       | 98.06  | 24.608 | 21       | 126.62 | 31.347 | 15       | 123.73 | 36.547 | 15       | 101.20 | 22.956  | 0.048                                    | 0.295         | 0.452         | 0.849         |       |  |
| Lymphs                      | %           | Not Estab.      | 18       | 33.28  | 6.296  | 16       | 30.81  | 7.764  | 17       | 30.12  | 7.925  | 21       | 34.00  | 7.764  | 16       | 33.75  | 8.151  | 16       | 32.75  | 10.103  | 0.760                                    | 0.175         | 0.260         | 0.761         |       |  |
| Lymphs (Absolute)           | x10E3/uL    | 0.9-5.0         | 18       | 1.82   | 0.484  | 16       | 2.02   | 0.526  | 17       | 1.71   | 0.484  | 21       | 2.20   | 0.627  | 16       | 2.23   | 0.618  | 16       | 2.15   | 0.654   | 0.047                                    | 0.123         | 0.572         | 0.303         |       |  |
| Magnesium                   | mg/dL       | 1.6-2.4         | 18       | 2.14   | 0.111  | 16       | 2.08   | 0.151  | 17       | 2.07   | 0.102  | 21       | 2.17   | 0.145  | 16       | 2.13   | 0.148  | 16       | 2.10   | 0.132   | 0.455                                    | 0.852         | 0.879         | 0.421         |       |  |
| MCH                         | pg          | 26.1-38.7       | 18       | 29.28  | 2.523  | 16       | 29.32  | 2.731  | 17       | 29.26  | 2.605  | 21       | 29.81  | 2.332  | 16       | 29.73  | 2.380  | 16       | 29.63  | 2.512   | 0.506                                    | 0.725         | 0.149         | 0.168         |       |  |
| MCHC                        | g/dL        | 31.9-36.8       | 18       | 33.48  | 1.052  | 16       | 33.28  | 1.063  | 17       | 33.48  | 0.741  | 21       | 33.32  | 0.883  | 16       | 33.16  | 1.055  | 16       | 33.15  | 1.074   | 0.619                                    | 0.687         | 0.795         | 0.706         |       |  |
| MCV                         | fL          | 79-110          | 18       | 87.33  | 6.791  | 16       | 87.94  | 6.995  | 17       | 87.35  | 6.721  | 21       | 89.43  | 5.786  | 16       | 89.63  | 6.071  | 16       | 89.31  | 6.400   | 0.317                                    | 0.950         | 0.292         | 0.123         |       |  |
| Monocytes                   | %           | Not Estab.      | 18       | 7.67   | 2.082  | 16       | 7.81   | 1.424  | 17       | 7.76   | 2.263  | 21       | 8.00   | 1.799  | 16       | 7.44   | 1.731  | 16       | 7.50   | 1.458   | 0.604                                    | 0.604         | 0.142         | 0.391         | 0.690 |  |
| Monocytes(Absolute)         | x10E3/uL    | 0.2-1.3         | 18       | 0.41   | 0.110  | 16       | 0.51   | 0.122  | 17       | 0.43   | 0.118  | 21       | 0.54   | 0.191  | 16       | 0.49   | 0.130  | 16       | 0.50   | 0.137   | 0.021                                    | 0.001         | 0.062         | 0.061         |       |  |
| Neutrophils                 | %           | Not Estab.      | 18       | 55.61  | 7.447  | 16       | 57.81  | 7.410  | 17       | 59.47  | 9.300  | 21       | 54.33  | 8.374  | 16       | 54.69  | 9.432  | 16       | 56.13  | 10.816  | 0.629                                    | 0.329         | 0.285         | 0.903         |       |  |
| Neutrophils (Absolute)      | x10E3/uL    | 1.2-6.1         | 18       | 3.12   | 0.991  | 16       | 3.88   | 1.101  | 17       | 3.45   | 1.026  | 21       | 3.62   | 1.124  | 16       | 3.67   | 0.887  | 16       | 3.77   | 1.012   | 0.161                                    | 0.011         | 0.063         | 0.151         |       |  |
| Phosphorus                  | mg/dL       | 2.5-7.1         | 18       | 3.27   | 0.421  | 16       | 3.50   | 0.582  | 17       | 3.16   | 0.511  | 21       | 3.20   | 0.453  | 16       | 3.29   | 0.597  | 16       | 2.94   | 0.579   | 0.644                                    | 0.424         | 0.311         | 0.808         |       |  |
| Platelets                   | x10E3/uL    | 140-396         | 18       | 270.44 | 59.770 | 16       | 272.13 | 56.253 | 17       | 247.88 | 43.710 | 21       | 267.52 | 43.177 | 16       | 251.25 | 40.172 | 16       | 277.75 | 44.463  | 0.864                                    | 0.139         | 0.102         | 0.013         |       |  |
| Potassium                   | mmol/L      | 3.7-5.2         | 18       | 4.51   | 0.205  | 16       | 4.47   | 0.293  | 17       | 4.50   | 0.243  | 21       | 4.42   | 0.374  | 16       | 4.38   | 0.248  | 16       | 4.34   | 0.333   | 0.370                                    | 0.938         | 0.621         | 0.577         |       |  |
| Prothrombin Time            | sec         | 10.2-15.4       | 18       | 10.48  | 0.289  | 16       | 10.44  | 0.341  | 17       | 10.60  | 0.485  | 21       | 10.27  | 0.360  | 15       | 10.19  | 0.360  | 16       | 10.38  | 0.419   | 0.059                                    | 0.512         | 0.521         | 0.176         |       |  |
| RBC                         | x10E6/uL    | 3.68-5.77       | 18       | 4.98   | 0.413  | 16       | 4.99   | 0.432  | 17       | 4.87   | 0.374  | 21       | 4.97   | 0.447  | 16       | 4.96   | 0.253  | 16       | 4.95   | 0.406   | 0.937                                    | 0.407         | 0.807         | 0.569         |       |  |
| RDW                         | %           | 12.1-16.9       | 18       | 13.89  | 1.142  | 16       | 14.24  | 1.163  | 17       | 13.98  | 0.859  | 21       | 13.90  | 0.961  | 16       | 13.75  | 0.839  | 16       | 13.77  | 0.820   | 0.975                                    | 0.002         | 0.418         | 0.283         |       |  |
| Sodium                      | mmol/L      | 134-144         | 18       | 140.72 | 1.557  | 16       | 140.81 | 2.038  | 17       | 140.76 | 2.237  | 21       | 141.52 | 2.038  | 16       | 140.50 | 1.768  | 16       | 141.06 | 0.827   | 0.193                                    | 0.315         | 0.859         | 0.529         |       |  |
| Triglycerides               | mg/dL       | 0-74            | 18       | 108.50 | 57.696 | 16       | 153.38 | 65.116 | 17       | 148.94 | 97.428 | 21       | 128.00 | 60.768 | 16       | 180.69 | 97.521 | 16       | 188.63 | 122.040 | 0.326                                    | 0.907         | 0.958         | 0.852         |       |  |
| TSH                         | uIU/mL      | 0.700           |          |        |        |          |        |        |          |        |        |          |        |        |          |        |        |          |        |         |                                          |               |               |               |       |  |

**Table S3b: Urine Laboratory Results.**

|                       |            |                 | Placebo  |        |        |          |        |        |          |        |        | ALRV5XR  |        |        |          |        |        |          |        |        | Placebo vs ALRV5XR                       |               |               |               |  |  |
|-----------------------|------------|-----------------|----------|--------|--------|----------|--------|--------|----------|--------|--------|----------|--------|--------|----------|--------|--------|----------|--------|--------|------------------------------------------|---------------|---------------|---------------|--|--|
|                       |            |                 | Baseline |        |        | 12 Weeks |        |        | 24 Weeks |        |        | Baseline |        |        | 12 Weeks |        |        | 24 Weeks |        |        | T-Tests P-Value<br>(Placebo vs. ALRV5XR) |               |               |               |  |  |
| Analyte               | UOM        | Reference Range | N        | Mean   | Stddev | BL                                       | BL - 12 Weeks | BL - 24 Weeks | 12 - 24 Weeks |  |  |
| <b>Urine:</b>         |            |                 |          |        |        |          |        |        |          |        |        |          |        |        |          |        |        |          |        |        |                                          |               |               |               |  |  |
| Alb/Creat Ratio       | mg/g creat | 0.0-30.0        | 18       | 4.74   | 4.535  | 16       | 4.36   | 3.242  | 17       | 3.86   | 2.480  | 21       | 12.90  | 29.818 | 16       | 5.96   | 7.800  | 16       | 14.06  | 24.084 | 0.270                                    | 0.495         | 0.722         | 0.191         |  |  |
| Albumin, Urine        | ug/mL      | Not Estab.      | 18       | 7.97   | 8.961  | 16       | 5.76   | 4.177  | 17       | 5.58   | 4.439  | 21       | 18.10  | 44.045 | 16       | 8.40   | 11.427 | 16       | 24.47  | 42.448 | 0.356                                    | 0.732         | 0.779         | 0.198         |  |  |
| Creatinine, Urine     | mg/dL      | Not Estab.      | 18       | 174.93 | 82.364 | 16       | 151.26 | 75.552 | 17       | 158.31 | 80.166 | 21       | 138.19 | 67.787 | 16       | 141.09 | 72.827 | 16       | 157.72 | 62.722 | 0.145                                    | 0.610         | 0.326         | 0.954         |  |  |
| pH                    |            | 5.0-7.5         | 18       | 5.86   | 0.847  | 16       | 5.69   | 0.527  | 17       | 6.26   | 0.987  | 21       | 5.98   | 0.932  | 16       | 5.84   | 0.896  | 16       | 6.19   | 0.827  | 0.698                                    | 0.949         | 0.314         | 0.646         |  |  |
| Specific Gravity      |            | 1.005-1.030     | 18       | 1.02   | 0.007  | 16       | 1.02   | 0.007  | 17       | 1.02   | 0.008  | 21       | 1.02   | 0.007  | 16       | 1.02   | 0.007  | 16       | 1.02   | 0.006  | 0.236                                    | 0.970         | 0.417         | 0.956         |  |  |
| Urobilinogen, Semi-Qn | mg/dL      | 0.2-1.0         | 18       | 0.29   | 0.251  | 16       | 0.25   | 0.194  | 17       | 0.34   | 0.305  | 21       | 0.24   | 0.170  | 16       | 0.25   | 0.194  | 16       | 0.30   | 0.265  | 0.471                                    | 0.964         | 0.521         | 0.680         |  |  |

**Table S3c: Physical Exam Results.**

|                       |        |                 | Placebo  |        |        |          |        |        |          |        |        | ALRV5XR  |        |        |          |        |        |          |        |        | Placebo vs ALRV5XR                       |               |               |               |  |  |
|-----------------------|--------|-----------------|----------|--------|--------|----------|--------|--------|----------|--------|--------|----------|--------|--------|----------|--------|--------|----------|--------|--------|------------------------------------------|---------------|---------------|---------------|--|--|
|                       |        |                 | Baseline |        |        | 12 Weeks |        |        | 24 Weeks |        |        | Baseline |        |        | 12 Weeks |        |        | 24 Weeks |        |        | T-Tests P-Value<br>(Placebo vs. ALRV5XR) |               |               |               |  |  |
| Analyte               | UOM    | Reference Range | N        | Mean   | Stddev | BL                                       | BL - 12 Weeks | BL - 24 Weeks | 12 - 24 Weeks |  |  |
| <b>Physical Exam:</b> |        |                 |          |        |        |          |        |        |          |        |        |          |        |        |          |        |        |          |        |        |                                          |               |               |               |  |  |
| Height (cm)           | cm     |                 | 22       | 175.94 | 12.783 | 22       | 175.94 | 12.783 | 22       | 175.95 | 12.733 | 22       | 173.70 | 9.522  | 22       | 173.59 | 10.298 | 22       | 173.93 | 9.183  | 0.523                                    | 0.927         | 0.628         | 0.784         |  |  |
| Weight (kg)           | kg     |                 | 22       | 84.47  | 23.029 | 21       | 84.17  | 22.782 | 19       | 85.38  | 22.886 | 22       | 84.77  | 17.277 | 20       | 87.13  | 15.915 | 18       | 88.68  | 13.889 | 0.962                                    | 0.711         | 0.858         | 0.903         |  |  |
| BMI                   | kg/m^2 |                 | 22       | 27.25  | 6.109  | 21       | 27.35  | 5.939  | 19       | 27.44  | 5.515  | 22       | 28.26  | 6.153  | 20       | 29.05  | 5.459  | 18       | 29.52  | 5.534  | 0.596                                    | 0.766         | 0.791         | 0.863         |  |  |
| Temperature           | deg F  |                 | 22       | 96.94  | 1.600  | 21       | 97.72  | 0.751  | 19       | 97.79  | 0.634  | 22       | 97.17  | 0.679  | 20       | 97.81  | 0.795  | 18       | 97.76  | 0.569  | 0.552                                    | 0.744         | 0.602         | 0.575         |  |  |
| RespiratoryRate       | bpm    |                 | 22       | 15.32  | 1.519  | 21       | 15.43  | 1.620  | 19       | 16.37  | 2.454  | 22       | 16.05  | 2.602  | 20       | 15.75  | 2.256  | 17       | 16.06  | 1.392  | 0.275                                    | 0.092         | 0.364         | 0.743         |  |  |
| BP-L DIA              | mmHg   |                 | 22       | 85.91  | 11.623 | 20       | 82.30  | 11.424 | 18       | 81.17  | 10.194 | 22       | 84.95  | 18.428 | 20       | 88.55  | 15.781 | 18       | 85.56  | 19.511 | 0.842                                    | 0.350         | 0.477         | 0.388         |  |  |
| BP-L SYS              | mmHg   |                 | 22       | 128.41 | 12.405 | 21       | 127.00 | 15.850 | 19       | 125.11 | 15.960 | 22       | 128.82 | 21.670 | 20       | 133.60 | 17.656 | 18       | 131.94 | 20.101 | 0.941                                    | 0.579         | 0.753         | 0.650         |  |  |
| BP-R DIA              | mmHg   |                 | 20       | 82.20  | 10.328 | 21       | 83.81  | 9.205  | 19       | 79.68  | 10.563 | 22       | 83.77  | 18.218 | 20       | 86.85  | 12.167 | 18       | 83.56  | 17.765 | 0.742                                    | 0.994         | 0.817         | 0.826         |  |  |
| BP-R SYS              | mmHg   |                 | 20       | 129.00 | 15.821 | 21       | 124.48 | 14.381 | 19       | 127.37 | 15.401 | 22       | 127.32 | 21.007 | 20       | 128.70 | 18.725 | 18       | 129.28 | 18.535 | 0.778                                    | 0.800         | 0.945         | 0.497         |  |  |
| Mean BP DIA           | mmHg   |                 | 22       | 84.11  | 9.628  | 21       | 83.07  | 9.963  | 19       | 81.42  | 9.967  | 22       | 84.36  | 17.561 | 20       | 87.70  | 12.743 | 18       | 84.56  | 15.404 | 0.955                                    | 0.640         | 0.765         | 0.453         |  |  |
| Mean BP SYS           | mmHg   |                 | 22       | 128.34 | 13.229 | 21       | 125.98 | 13.616 | 19       | 126.26 | 15.076 | 22       | 128.07 | 21.015 | 20       | 131.15 | 15.750 | 18       | 130.61 | 13.141 | 0.960                                    | 0.653         | 0.859         | 0.502         |  |  |
| Heart rate            | bpm    |                 | 22       | 77.27  | 11.258 | 21       | 78.29  | 12.279 | 19       | 82.58  | 12.504 | 22       | 77.05  | 14.537 | 20       | 75.10  | 10.094 | 17       | 77.76  | 9.478  | 0.955                                    | 0.335         | 0.106         | 0.496         |  |  |

**Table S4: Adverse Events.** No adverse events (AE's) or serious adverse events (SAE's) were reported in either the ALRV5XR or Placebo groups. A list of AE's typically reported in clinical trials of AGA are identified.

| Possible Adverse Events                   |
|-------------------------------------------|
| Acne                                      |
| Burning/Stinging                          |
| Decreased Libido                          |
| Desquamation/Dandruff                     |
| Elevated Blood Pressure                   |
| Erythema                                  |
| Feeling of Skin Tension                   |
| Folliculitis                              |
| Gastrointestinal Complaints/Stomach Upset |
| Headache                                  |
| Joint Stiffness                           |
| Malaise and Fatigue                       |
| Mood Disorders                            |
| Neurology-related Complaints              |
| Papules                                   |
| Peripheral Edema/Fluid Retention          |
| Pruritus                                  |
| Sexual Dysfunction                        |
| Skin Disorders                            |

**Table S5: ALRV5XR Responder Distribution.** For the ALRV5XR treatment group, the **Change in Terminal Hairs/cm<sup>2</sup>** shows a significant shift of subjects' hair count changes with a relatively even distribution of 0-20 TH/cm<sup>2</sup> at week 12. Non-responders from week 12 began to respond by week 24 increasing the proportion of low responders. The overall changes at week 24 show an increased terminal regrowth rate separating into a trimodal effect of low responders increasing density between 0 and 5 THs/cm<sup>2</sup> (45·5%), moderate responders increasing density 10-20 THs/cm<sup>2</sup> (36·4%), and high responders regrowing more than 25 THs/cm<sup>2</sup> (18·2%). The **Per Cent Change in Terminal Hairs** also shows a significant shift of subjects' hair % changes at week 12, increasing regrowth at week 24 to more uniform distribution for moderate and high responders and increasing the proportion of low responders from the population of non-responders at 12 weeks.

|                                                | Week 0-12 | Week 0-24 |
|------------------------------------------------|-----------|-----------|
| <b>Change in Terminal Hairs/cm<sup>2</sup></b> |           |           |
| 0-5                                            | 30·0%     | 45·5%     |
| 5-10                                           | 30·0%     | -         |
| 10-15                                          | 20·0%     | 27·3%     |
| 15-20                                          | 10·0%     | 9·1%      |
| 20-25                                          | -         | -         |
| ≥25                                            | 10·0%     | 18·2%     |
| <b>Per Cent Change in Terminal Hairs</b>       |           |           |
| 0-5%                                           | 50·0%     | 45·5%     |
| 5-10%                                          | 30·0%     | 9·1%      |
| 10-15%                                         | -         | 18·2%     |
| 15-20%                                         | -         | 9·1%      |
| 20-25%                                         | 20·0%     | 9·1%      |
| ≥25%                                           | -         | 9·1%      |

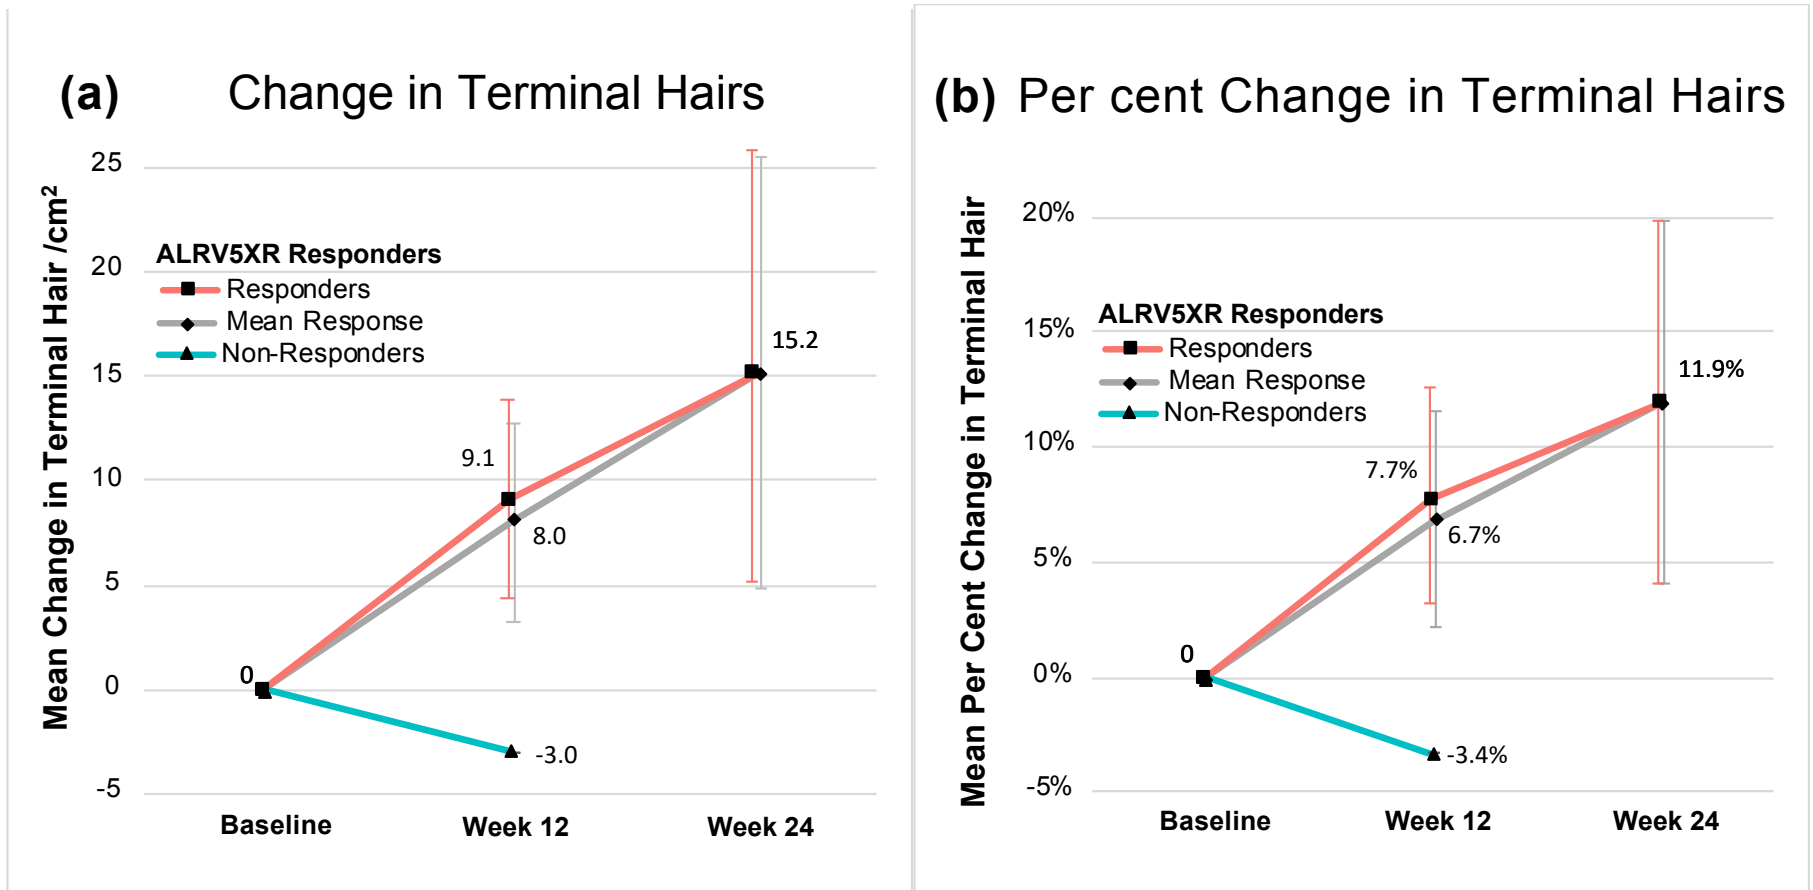

**Figure S1. ALRV5XR treatment group changes in Terminal Hair. (a) Changes per cm<sup>2</sup>. (b) Changes by per cent.** The mean regrowth response rate within the ALRV5XR group showed a statistically significant increase from baseline ( $P_{12\text{weeks}} = 0.0099$  and  $P_{24\text{weeks}} < 0.0190$ ). Non-responders in the first 12 weeks began to regrow hair in the 12 - 24 week period and by week 24, all initial non-responders had become responders. 95% Confidence Intervals for each response group are shown.

## Appendix S1: Supplementary Statistical Methods

Mean changes from baseline were analysed using a restricted maximum likelihood based repeated measures approach in combination with the Newton Raphson Algorithm. Analyses include the fixed, categorical effects of treatment, visit, and treatment-by-visit interaction, as well as the continuous, fixed covariates of baseline score and baseline score-by-visit interaction. A-common unstructured covariance structure was used to model the within-patient errors. When this analysis failed to converge, structures were tested in a subsequent order until model-convergence was achieved. The Kenward-Roger approximation was used to estimate denominator degrees of freedom. Significance tests were based on least-squares means using a two-sided  $\alpha = 0.05$  (two-sided 95% confidence intervals). The primary treatment comparisons, were the contrast between treatments at the endpoint visit. (*Hackl S, et al, 2019*)
